# Supplementary material for: Development of a Radiomics-based Model Using Computed Tomography Imaging to Assess the Incidence of Extrapulmonary Organ Involvement in Mycoplasma Pneumoniae Pneumonia and to Predict Recovery Times: A Multicenter Study
Source: Research Square preprint supplement (doi:10.21203/rs.3.rs-7191841/v1), 2025-08-18
Supplement: Supplementary file 1 [file d8b1d3c057e6faaf322f3a23.docx]

1 Supplementary information

1.1 CT image acquisition parameters

Scan parameters for United-Imaging UCT968 were: tube voltage 120 kV, tube current 20-50 mA, pitch 0.984, matrix 512×512, slice thickness 5 mm, lung window (window width 1500 HU, window level -500 HU), mediastinal window (window width 350 HU, window level 40 HU); axial reconstruction with a lung window, slice thickness 0.625-1.250 mm. PHILIPS Brilince iCT scan parameters were: tube voltage 120 kV, tube current 50-300 mA, pitch 1, matrix 512×512, slice thickness 5 mm, lung window (window width 1500 HU, window level -500 HU), mediastinal window (window width 350 HU, window level 40 HU); axial reconstruction with a lung window, slice thickness 1.25 mm. Siemens SOMATOM Perspective scan parameters were: detector collimation width 64×0.6 mm, tube voltage 120 kV, adaptive tube current technology. Lung window (window width 1500 HU, window level -500 HU), mediastinal window (window width 350 HU, window level 40 HU) axial reconstruction with a lung window; slice thickness 1.25 mm.Parameters for chest CT scanning were listed。

**1.2 Feature selection and model construction**

T-test screening (based on statistical significance)

To screen out features with statistically significant differences in different categories by T-test.Procedure:The data is divided into two groups: group_a with label 0 and group_b with label 1.The Levene test is used to check whether the variance of each feature is equal in both groups. If the variances are equal, a standard T-test is used.If the variances are not equal, a T test for unequal variances is used.Only when the P-value of the T-test is less than 0.05, the feature is considered to be significantly different between the two groups, and the feature is retained.Store all features that pass the T-test in the list index.Result: At the end of this step, only those features that are significantly different in different categories are retained.

LASSO regression screening (based on sparsity)

The goal: to further reduce features through LASSO regression, retaining the most important features.Procedure:The feature data that passes the T-test is normalized so that the mean of all features is 0 and the variance is 1.A LASSO regression model with cross-validation (LassoCV) was used to train the normalized feature data. By introducing L1 regularization, LASSO can compress the coefficients of some features to 0.The LASSO model automatically selects the best regularization intensity (alpha) and uses this value to determine which features have a coefficient of 0 and which features have a non-zero coefficient.Retain features with non-zero coefficients, which are considered to contribute most to model predictions.Result: At the end of this step, the most predictive features selected by the LASSO model are retained.

Calculation of Pearson correlation coefficient

The Pearson correlation coefficient is used to measure the linear correlation between two variables, as follows: XiX_iXi is the eigenvalue,YiY_iYi is the target variable (label),Xˉ\bar{X}Xˉ and Yˉ\bar{Y}Yˉ are the mean values of the eigenvalues and the target variables, respectively.This formula calculates the linear correlation between the feature and the target variable, and the result is between -1 and 1:1 indicates a perfectly positive correlation,-1 means a perfect negative correlation,0 means there is no linear relationship.

| Supplementary Table 1.Characterization of the patient's laboratory biochemistry | | | | | | | | | | | | | | | | | | |
| --- | --- | --- | --- | --- | --- | --- | --- | --- | --- | --- | --- | --- | --- | --- | --- | --- | --- | --- |
| **Characteristics** | **Training cohort (n=378)** | | | | | | | | **Testing cohort(n=99)** | | | | | | | | | ***p*-Value** |
| **Label=0** | **Label=1** | **Label=2** | | **Label=3** | | ***p*-Value** | | **Label=0** | **Label=1** | | **Label=2** | | **Label=3** | | ***p*-Value** | |
| Neut | 2.14  [1.64,2.83] | 1.74  [1.50,2.21] | | 1.96  [1.45,2.77] | | 1.60  [1.25,2.53] | | 0.041 | 2.13  [1.60,2.76] | | 2.76 [1.92,3.14] | | 2.19  [1.89,3.16] | | 1.94 [1.61,3.90] | | 0.697 | 0.281 |
| Lym | 0.60  [0.45,0.83] | 0.56  [0.47,0.65] | | 0.53  [0.36,0.74] | | 0.51  [0.37,0.69] | | 0.091 | 0.54  [0.42,0.81] | | 0.54 [0.33,0.87] | | 0.63  [0.48,0.94] | | 0.66 [0.22,0.81] | | 0.504 | 0.877 |
| Mono | 0.080  [0.030,0.150] | 0.065  [0.007,0.258] | | 0.085  [0.030,0.210] | | 0.040  [0.015,0.090] | | 0.369 | 0.080  [0.020,0.190] | | 0.215 [0.045,0.273] | | 0.070  [0.020,0.310] | | [0.010 [0.010.0.010](/Users/haojiawei/Documents\\x/0.010.0.010)] | | 0.327 | 0.592 |
| CK | 60.0 [47.0,92.7] | 271.0 [209.2,303.7] | | 70.5 [45.2,114.2] | | 303.0 [157.5,467.5] | | <0.001 | 74.0 [47.0,102.0] | | 319.0 [263.7,394.5] | | 58.0 [47.0,100.0] | | 246.0 [87.5,350.0] | | 0.001 | 0.238 |
| CK-MB | 2.17  [1.32,2.67] | 2.16  [1.43,2.68] | | 2.28  [1.70,2.97] | | 3.53  [2.18,5.08] | | 0.001 | 1.95  [1.22,2.48] | | 2.92 [1.11,3.86] | | 2.17  [1.59,2.68] | | 3.77 [2.61,4.51] | | 0.022 | 0.632 |
| ALT | 2.00 [10.0,15.0] | 16.5 [11.5,18.7] | | 48.5 [31.5,80.2] | | 84.0 [44.0,108.5] | | <0.001 | 12.0 [10.0,16.0] | | 21.0 [14.5,26.0] | | 51.0 [31.0,133.0] | | 84.0 [66.5.91.5] | | <0.001 | 0.022 |
| AST | 26.0 [22.0,32.0] | 31.5 [29.7,36.0] | | 51.0 [42.2.75.5] | | 75.0 [61.0,92.5] | | <0.001 | 25.0 [21.0.29.0] | | 32.5 [29.2,35.7] | | [53.0](/Users/haojiawei/Documents\\x/45.000.88.0001)  [[45.0.88.0]](/Users/haojiawei/Documents\\x/45.000.88.0001) | | 102.0  [62.0,140.0] | | <0.001 | 0.704 |
| FIB | 3.91  [3.41,4.36] | 3.98  [3.65,4.30] | | 3.78  [3.25,4.36] | | 4.23  [3.56,4.77] | | 0.412 | 3.91  [3.41,4.29] | | 3.19 [2.97,3.79] | | 3.71  [3.47,4.22] | | 3.91 [2.79,4.26] | | 0.581 | 0.335 |
| CRP | 5.97  [2.17,18.36] | 7.77 [3.45,14.01] | | 8.87 [2.38,18.98] | | 18.59 [9.64,31.86] | | 0.063 | 7.91 [2.00,12.44] | | 3.54 [1.86,5.47] | | 16.35 [5.90,27.77] | | 9.58 [0.77,35.57] | | 0.058 | 0.692 |
| SII | 649.1  [427.7,1059.3] | 670.7  [464.8,902.9] | | 630.9  [409.5,914.1] | | 672.1  [524.1,1092.8] | | 0.850 | 560.9  [370.3,899.8] | | 520.6  [352.6,618.1] | | 635.6  [397.1,1047.6] | | 1255.9  [574.2,1729.4] | | 0.327 | 0.319 |
| WBC,whitebloodcell;NEUT,Neutrophils;LC,Lymphocyte;Mono,Monocyte;PLT,Platelet;LDH,Lactic dehydrogenase;APTT,activated partial thromboplastin time;FIB,Fibrinogen;PCT,procalcitonin,CRP,c reactive protein;SII,Systemic immune inflammation index.Label 0: No extrapulmonary involvement; Label 1: Cardiomyocyte involvement; Label 2:Hepatocyte involvement; Label 3:Combined myocardial and hepatocyte involvement.  All counting types of treatments were expressed as n (%);All continuous data have been expressed as Median (Q1 to Q3), Student's t test was used when variables were normal distribution,and Mann-Whitney U test was used when variables were non-norrnal distribution for continuous variables and chi-square test was used for qualitative variables to analyze whether there were statistically signifcant differences;All statistical tests were two-sided, and p value lower than 0.05 were considered statistically signifcant. | | | | | | | | | | | | | | | | | | |

| Supplementary Table 2.The Characterization of patient Imaging | | | | | | | | | | | | | | | | | | | |
| --- | --- | --- | --- | --- | --- | --- | --- | --- | --- | --- | --- | --- | --- | --- | --- | --- | --- | --- | --- |
| **Characteristics** | **Training cohort (n=378)** | | | | | | | | | **Testing cohort(n=99)** | | | | | | | | | ***P-*Value** |
| **Label=0** | **Label=1** | | **Label=2** | | **Label=3** | | ***p*-Value** | | **Label=0** | **Label=1** | | **Label=2** | | **Label=3** | | ***p*-Value** | |
| Atelectasis | | |  | |  | |  | |  |  | |  | |  | |  | |  |  |
| No | 238 (89.47) | | 16 (100.00) | | 69 (84.14) | | 12 (80.00) | | 0.055 | 49 (85.96) | | 6 (100.00) | | 26 (89.65) | | 5 (71.42) | | 0.145 | 0.685 |
| Yes | 28 (10.45) | | 0 (0.00) | | 13 (15.85) | | 3 (20.00) | |  | 8 (14.03) | | 0 (0.00) | | 3 (10.34) | | 2 (28.57) | |  |  |
| Consolidation mixed GGO | | |  | |  | |  | |  |  | |  | |  | |  | |  |  |
| No | 121 (45.48) | | 3 (18.75) | | 29 (35.36) | | 5 (33.33) | | 0.145 | 29 (50.87) | | 2 (33.33) | | 14 (48.27) | | 5 (71.42) | | 0.145 | 0.115 |
| Yes | 145 (54.51) | | 13 (81.25) | | 53 (64.63) | | 10 (66.66) | |  | 28 (49.12) | | 4 (66.66) | | 15 (51.72) | | 2 (28.57) | |  |  |
| Halo sign | | |  | |  | |  | |  |  | |  | |  | |  | |  |  |
| No | 198 (74.43) | | 11 (68.75) | | 50 (60.976) | | 6 (40.00) | | 0.145 | 39 (68.42) | | 6 (100.00) | | 18 (62.06) | | 3 (42.85) | | 0.145 | 0.532 |
| Yes | 68 (25.56) | | 5 (31.25) | | 32 (39.02) | | 9 (60.00) | |  | 18 (31.57) | | 0 (0.000) | | 11 (37.93) | | 4 (57.14) | |  |  |
| Cavitation | | |  | |  | |  | |  |  | |  | |  | |  | |  |  |
| No | 263 (98.87) | | 16 (100.00) | | 82 (100.00) | | 15 (100.00) | | 0.154 | 57 (100.00) | | 6 (100.00) | | 28 (96.55) | | 7 (100.00) | | 0.290 | 0.832 |
| Yes | 3 (1.12) | | 0 (0.00) | | 0 (0.00) | | 0 (0.00) | |  | 0 (0.00) | | 0 (0.00) | | 1 (3.44) | | 0 (0.00) | |  |  |
| Nodule | | |  | |  | |  | |  |  | |  | |  | |  | |  |  |
| No | 125 (46.99) | | 6 (37.50) | | 51 (62.19) | | 10 (66.66) | | 0.145 | 26 (45.61) | | 4 (66.66) | | 23 (79.31) | | 5 (71.42) | | 0.120 | 0.160 |
| Yes | 141 (53.00) | | 10 (62.50) | | 31 (37.80) | | 5 (33.33) | |  | 31 (54.38) | | 2 (33.33) | | 6 (20.69) | | 2 (28.57) | |  |  |
| GGO | | |  | |  | |  | |  |  | |  | |  | |  | |  |  |
| No | 115 (43.23) | | 7 (43.75) | | 47 (57.31) | | 10 (66.66) | | 0.145 | 31 (54.38) | | 5 (83.33) | | 21 (72.41) | | 3 (42.85) | | 0.145 | 0.018 |
| Yes | 151 (56.76) | | 9 (56.25) | | 35 (42.68) | | 5 (33.33) | |  | 26 (45.61) | | 1 (16.66) | | 8 (27.58) | | 4 (57.14) | |  |  |
| Adjacent pleura thickening | | |  | |  | |  | |  |  | |  | |  | |  | |  |  |
| No | 251 (94.36) | | 16 (100.00) | | 79 (96.34) | | 15 (100.00) | | 0.120 | 55 (96.49) | | 6 (100.00) | | 28 (96.55) | | 7 (100.00) | | 0.145 | 0.115 |
| Yes | 15 (5.63) | | 0 (0.00) | | 3 (3.65) | | 0 (0.00) | |  | 2 (3.50) | | 0 (0.00) | | 1 (3.44) | | 0 (0.00) | |  |  |
| Air bronchogram sign | | |  | |  | |  | |  |  | |  | |  | |  | |  |  |
| No | 98 (36.84) | | 5 (31.25) | | 23 (28.04) | | 3 (20.00) | | 0.145 | 24 (42.10) | | 4 (66.66) | | 6 (20.69) | | 5 (71.42) | | 0.120 | 0.32 |
| Yes | 168 (63.15) | | 11 (68.75) | | 59 (71.95) | | 12 (80.00) | |  | 33 (57.89) | | 2 (33.33) | | 23 (79.31) | | 2 (28.57) | |  |  |
| bronchial wall thickening | | |  | |  | |  | |  |  | |  | |  | |  | |  |  |
| No | 189 (71.05) | | 8 (50.00) | | 73 (89.02) | | 14 (93.33) | | 0.145 | 39 (68.42) | | 5 (83.33) | | 25 (86.20) | | 6 (85.71) | | 0.120 | 0.866 |
| Yes | 77 (28.94) | | 8 (50.00) | | 9 (10.97) | | 1 (6.66) | |  | 18 (31.57) | | 1 (16.66) | | 4 (13.79) | | 1 (14.28) | |  |  |
| Reticular pattern | | |  | |  | |  | |  |  | |  | |  | |  | |  |  |
| No | 241 (90.60) | | 14 (87.50) | | 76 (92.68) | | 15 (100.00) | | 0.123 | 54 (94.73) | | 6 (100.00) | | 29 (100.00) | | 6 (85.71) | | 0.212 | 0.364 |
| Yes | 25 (9.39) | | 2 (12.50) | | 6 (7.21) | | 0 (0.00) | |  | 3 (5.26) | | 0 (0.00) | | 0 (0.00) | | 1 (14.28) | |  |  |
| Fiber cords | | |  | |  | |  | |  |  | |  | |  | |  | |  |  |
| No | 209 (78.57) | | 13 (81.25) | | 66 (80.48) | | 14 (93.33) | | 0.145 | 41 (71.93) | | 3 (50.00) | | 23 (79.31) | | 6 (85.71) | | 0.145 | 0.201 |
| Yes | 57 (21.42) | | 3 (18.75) | | 16 (19.51) | | 1 (6.66) | |  | 16 (28.07) | | 3 (50.00) | | 6 (20.69) | | 1 (14.28) | |  |  |
| Bilateral lobe pneumonia | | |  | |  | |  | |  |  | |  | |  | |  | |  |  |
| No | 154 (57.89) | | 9 (56.25) | | 51 (62.19) | | 7 (46.66) | | 0.055 | 35 (61.40) | | 2 (33.33) | | 17 (58.62) | | 4 (57.14) | | 0.145 | 0.931 |
| Yes | 112 (42.10) | | 7 (43.75) | | 31 (37.80) | | 8 (53.33) | |  | 22 (38.59) | | 4 (66.66) | | 12 (41.37) | | 3 (42.85) | |  |  |
| Label 0: No extrapulmonary involvement; Label 1: Cardiomyocyte involvement; Label 2:Hepatocyte involvement; Label 3:Combined myocardial and hepatocyte involvement.  All counting types of treatments were expressed as n (%), Student's t test was used when variables were normal distribution, and Mann-Whitney U test was used when variables were non-norrnal distribution for continuous variables and chi-square test was used for qualitative variables to analyze whether there were statistically signifcant differences. All statistical tests were two-sided, and p value lower than 0.05 were considered statistically signifcant. | | | | | | | | | | | | | | | | | | | |

| Supplementary Table3.Statistical Analysis of Characteristics Selection | | | | | | | | | |
| --- | --- | --- | --- | --- | --- | --- | --- | --- | --- |
| **Characteristics** | ***P*-Value** | **Characteristics** | ***P*-Value** | **Characteristics** | ***P*-Value** | **Characteristics** | ***P*-Value** | **Characteristics** | ***P*-Value** |
| **Clinical Laboratory Characteristics** | | |  |  |  |  |  |  |  |
| LDH | <0.05 | Antibody_titers | <0.05 | D-dimer | <0.05 | APTT | <0.05 | Body Tempreture | <0.05 |
| **Image Feature** |  |  |  |  |  |  |  |  |  |
| Pleural effusion | <0.05 | Consolidation pattern | <0.05 |  |  |  |  |  |  |
| **Radiomics** |  |  |  |  |  |  |  |  |  |
| exponential_glszm_  LowGrayLevelZoneEmphasis | <0.05 | gradient_glrlm_  ShortRunLowGray  LevelEmphasis | <0.05 | exponential_glszm_  SizeZoneNon  UniformityNormalized | <0.05 | log-sigma-3-mm-3D_glszm_SizeZoneNonUniformity | <0.05 | exponential_glrlm_LongRunEmphasis | <0.05 |
| square_gldm_  DependenceEntropy | <0.05 | wavelet-HHH_glrlm_  ShortRunEmphasis | <0.05 | wavelet-HLL_gldm_  LargeDependenceHigh  GrayLevelEmphasis | <0.05 | log-sigma-5-mm-3D_glszm_GrayLevel NonUniformity | <0.05 | exponential_glrlm_LongRunHigh  GrayLevelEmphasis | <0.05 |
| square_glrlm_  ShortRunLow GrayLevelEmphasis | <0.05 | gradient_glszm_GrayLevelNonUniformity | <0.05 | wavelet-LHL_gldm_  LargeDependenceHigh  GrayLevelEmphasis | <0.05 | log-sigma-5-mm-3D_glszm_SizeZone  NonUniformity | <0.05 | exponential_gldm_DependenceNon  UniformityNormalized | <0.05 |
| square_gldm_  DependenceVariance | <0.05 | square_firstorder_  Range | <0.05 | square_firstorder_  Maximum | <0.05 | wavelet-LHL_glrlm_LongRunHighGrayLevelEmphasis | <0.05 | gradient_firstorder_Skewness | <0.05 |
| exponential_glrlm_  ShortRunLow  GrayLevelEmphasis | <0.05 | wavelet-HLL_glrlm_  LongRunHigh  GrayLevelEmphasis | <0.05 | original_glcm_  Idn | <0.05 | log-sigma-3-mm-3D_glszm_GrayLeve  lNonUniformity | <0.05 | exponential_glszm_SmallAreaEmphasis | <0.05 |
| exponential_glszm_GrayLevelNonUniformityNormalized | <0.05 | square_gldm_LargeDependenceEmphasis | <0.05 | exponential_firstorder_  Skewness | <0.05 | gradient_firstorder_  Kurtosis | <0.05 | wavelet-HHH_glcm_MCC | <0.05 |
| exponential_gldm_  DependenceVariance | <0.05 | gradient_glszm_  SizeZoneNonUniformity | <0.05 | exponential_glrlm_  LongRunLow  GrayLevelEmphasis | <0.05 | wavelet-HHH_gldm_LargeDependenceEmphasis | <0.05 | square_gldm_  DependenceNon  UniformityNormalized | <0.05 |
| exponential_glrlm_  ShortRunEmphasis | <0.05 | wavelet-HLH_glcm_  MCC | <0.05 | wavelet-LLH_firstorder_Mean | <0.05 | exponential_glrlm_  RunVariance | <0.05 | wavelet-LLH_firstorder_RootMeanSquared | <0.05 |
| exponential_gldm_  DependenceEntropy | <0.05 |  |  |  |  |  |  |  |  |
| LDH: lactate dehydrogenase; APTT: activated partial thromboplastin time | | | | | | | | | |
